# Supplementary material
Source: PubMed Central journal article supplement (PMC3468459)
Supplement: supp_00269.2012_legends.pdf [file supp_00269.2012_legends.pdf]

## SUPPLEMENTAL MATERIAL

### **Video Legends**

Supplemental Video 1: Structured light imaging of beating heart during sinus rhythm. Left: Black and white texture of beating. Right: 3D structured light surface of beating heart.

Supplemental Video 2: Normalized displacement mapped on to beating heart during sinus rhythm. Below: Pair ECG (blue) and displacement energy (green).

Supplemental Video 3: Normalized displacement mapped on to beating heart during left ventricular apical pacing (CL = 200 msec). Below: Pair ECG (blue) and displacement energy (green).

Supplemental Video 4: Normalized displacement mapped on to beating heart during ventricular fibrillation (VF). Below: Pair ECG (blue) and displacement energy (green).
